# Supplementary material for: Molecular Cooperation between the Werner Syndrome Protein and Replication Protein A in Relation to Replication Fork Blockage
Source: PubMed Central journal article supplement — J Biol Chem. 2010 Nov 24;286(5):3497–508. doi: 10.1074/jbc.M110.105411 (PMC3030355; doi:10.1074/jbc.m110.105411), 2010-11-24
Supplement: supp_M110.105411_jbc.M110.105411-1.pdf [file supp_M110.105411_jbc.M110.105411-1.pdf]

**Supplemental Table 1. Oligonucleotides<sup>1</sup> used in this study.**

leadP122

CGTGACTTGATGTTAACCCCTAACCCCTAAGATATCGCGTTAAGTGAGTGTGAGGATACATGT-  
AGGCAATTGCCACGTGTCTATCAGCTGAAGTTGTTTCGCGACGTGCGATCGTCGCTGCGACG

lagP122

CGTCGCAGCGACGATCGCACGTCGCGAACCACTTCAGCTGATAGACACGTGGCAATTGCCT-  
ACATGTATCCTCACACTCTGAATACGCGATATCTTAGGGTTAGGGTTAACATCAAGTCACG

lagD82

TCAGAGTGTGAGGATACATGTAGGCAATTGCCACGTGTCTATCAGCTGAAGTTGTTTCGCGA-  
CGTGCGATCGTCGCTGCGACG

leadD52

CGTCGCAGCGACGATCGCACGTCGCGAACCACTTCAGCTGATAGACACGTGG

lagP38-3'

ACGCGATATCTTAGGGTTAGGGTTAACATCAAGTCACG

ss32

TAAGTGAGTGTGAGGATACATGTAGGCAATTG

---

<sup>1</sup>All oligonucleotides are represented in 5' to 3' orientation.

**Supplementary Figure 1. Displacement of RPA bound to the ssDNA gap of model DNA substrate by WRN-E84A.** **A)** Structure of the model gapped DNA duplex substrate. The position of radiolabel is indicated by asterisk. **B)** Gapped DNA duplex substrate (20 fmol) was incubated in the presence or absence of RPA (20 fmol) for 5 min at 25°C, followed by subsequent incubation with or without WRN-E84A (50 fmol) for an additional 5 min at 25°C. This is followed by the addition of ATP (1 mM) and/or 20 fmol of radiolabeled 32-mer (\*ss32) and further incubation at 37°C for 10 min. The reactions are then analyzed by EMSA as described in Experimental Procedures. Positions of migration of the labeled gapped duplex (Gap) and ss32 DNA species and Gap-RPA, Gap-WRN and ss32-RPA complexes are denoted at left.

**A**

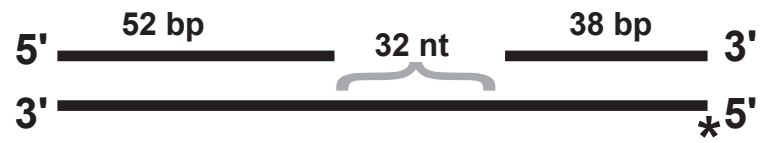

**B**

|          |   |   |   |   |   |   |   |
|----------|---|---|---|---|---|---|---|
| * ss32   | ■ | ■ | + | + | + | ■ | + |
| WRN-E84A | ■ | ■ | ■ | + | ■ | + | ■ |
| RPA      | ■ | + | + | + | + | ■ | ■ |
| * Gap    | + | + | + | + | ■ | + | ■ |

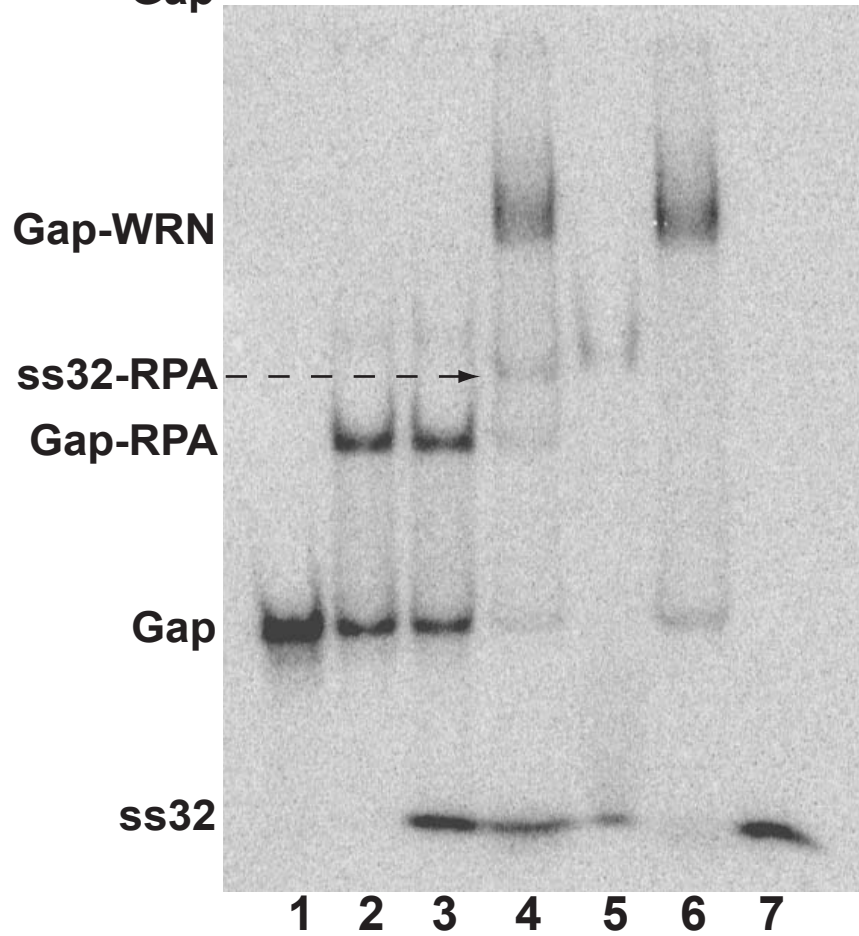

**Supplemental Fig. 1**
